# Supplementary material
Source: PubMed Central journal article supplement (PMC3813872)
Supplement: 955d929d2a2dddee674432232f56b69c_genetics.113.154393-3.pdf [file 955d929d2a2dddee674432232f56b69c_genetics.113.154393-3.pdf]

**Table S1 Transgenic *C. elegans* strains and plasmids**

| <b>Transgene</b> | <b>DNA constructs</b>                                                  | <b>Genotype</b>          | <b>Strain #</b> |
|------------------|------------------------------------------------------------------------|--------------------------|-----------------|
| <i>juEx16*</i>   | VAB-1(+) cosmid (M03A1)                                                | <i>vab-1(0); kyls104</i> | CZ11816         |
| <i>juEx2870</i>  | VAB-1(+) fosmid (WRM0617bA10)<br>(100ng/μl)                            | <i>vab-1(0); kyls104</i> | CZ14390         |
| <i>juEx3839</i>  | VAB-1(+) minigene (pCZ55) (1ng/μl)                                     | <i>vab-1(0); kyls104</i> | CZ14800         |
| <i>juEx3529</i>  | <i>Punc-33</i> -VAB-1 ( <i>vab-1</i> 3'UTR)<br>(pCZGY1859) (1ng/μl)    | <i>vab-1(0); kyls104</i> | CZ14078         |
| <i>juEx3470</i>  | <i>Prgef-1</i> -VAB-1 ( <i>vab-1</i> 3'UTR) (pCZGY1847)<br>(1 ng/μl)   | <i>vab-1(0); kyls104</i> | CZ14082         |
| <i>juEx3836</i>  | <i>Pmyo-2</i> -VAB-1 ( <i>vab-1</i> 3'UTR) (pCZGY1854)<br>(1 ng/μl)    | <i>vab-1(0); kyls104</i> | CZ14713         |
| <i>juEx4725</i>  | <i>Plin-26</i> -VAB-1 ( <i>vab-1</i> 3'UTR) (pCZGY2220)<br>(1 ng/μl)   | <i>vab-1(0); kyls104</i> | CZ16392         |
| <i>juEx4728</i>  | <i>Phlh-17</i> -VAB-1 ( <i>vab-1</i> 3'UTR) (pCZGY1852)<br>(1 ng/μl)   | <i>vab-1(0); kyls104</i> | CZ16835         |
| <i>juEx3308</i>  | <i>Pdyf-7</i> -VAB-1 ( <i>vab-1</i> 3'UTR) (pCZGY1342)<br>(15 ng/μl)   | <i>vab-1(0); kyls104</i> | CZ13960         |
| <i>juEx4527</i>  | <i>Pttx-3</i> -VAB-1 ( <i>vab-1</i> 3'UTR) (pCZGY1841)<br>(5 ng/μl)    | <i>vab-1(0); kyls104</i> | CZ16033         |
| <i>juEx4857</i>  | <i>Pstr-1</i> -VAB-1 ( <i>vab-1</i> 3'UTR) (pCZGY2221)<br>(1 ng/μl)    | <i>vab-1(0); kyls104</i> | CZ17039         |
| <i>juEx3179</i>  | <i>Pdyf-7</i> -EFN-1 ( <i>unc-54</i> 3'UTR) (pCZGY1340)<br>(1 ng/μl)   | <i>vab-1(0); kyls104</i> | CZ17654         |
| <i>juEx5418</i>  | <i>Pdyf-7</i> -EFN-2 ( <i>unc-54</i> 3'UTR) (pCZGY1343)<br>(1 ng/μl)   | <i>vab-1(0); kyls104</i> | CZ18326         |
| <i>juEx127**</i> | EFN-1(+) (pCZ126) (50 ng/μl)                                           | <i>efn-1(0); kyls104</i> | CZ14447         |
| <i>juls52**</i>  | EFN-1::GFP (pCZ131) (50 ng/μl)                                         | <i>efn-1(0); kyls104</i> | CZ13080         |
| <i>juEx3775</i>  | <i>Pdpy-30</i> -EFN-1 ( <i>unc-54</i> 3'UTR)<br>(pCZGY1843) (1 ng/μl)  | <i>efn-1(0); kyls104</i> | CZ14487         |
| <i>juEx3577</i>  | <i>Punc-33</i> -EFN-1 ( <i>efn-1</i> 3'UTR) (pCZGY1857)<br>(1 ng/μl)   | <i>efn-1(0); kyls104</i> | n/a             |
| <i>juEx3476</i>  | <i>Punc-119</i> -EFN-1 ( <i>unc-54</i> 3'UTR)<br>(pCZGY1860) (1 ng/μl) | <i>efn-1(0); kyls104</i> | CZ14086         |
| <i>juEx3158</i>  | <i>Prgef-1</i> -EFN-1 ( <i>unc-54</i> 3'UTR)<br>(pCZGY1344) (1 ng/μl)  | <i>efn-1(0); kyls104</i> | CZ13372         |
| <i>juEx3835</i>  | <i>Pmyo-2</i> -EFN-1 ( <i>efn-1</i> 3'UTR) (pCZGY1853)<br>(1 ng/μl)    | <i>efn-1(0); kyls104</i> | CZ14694         |
| <i>juEx4864</i>  | <i>Phlh-17</i> -EFN-1 ( <i>efn-1</i> 3'UTR) (pCZGY1851)<br>(1 ng/μl)   | <i>efn-1(0); kyls104</i> | CZ17042         |
| <i>juEx4524</i>  | <i>Pttx-3</i> -EFN-1 ( <i>efn-1</i> 3'UTR) (pCZGY1839)<br>(5 ng/μl)    | <i>efn-1(0); kyls104</i> | CZ16028         |
| <i>juEx4860</i>  | <i>Plin-26</i> -EFN-1 ( <i>efn-1</i> 3'UTR) (pCZGY2223)<br>(1 ng/μl)   | <i>efn-1(0); kyls104</i> | CZ16642         |
| <i>juEx3179</i>  | <i>Pdyf-7</i> -EFN-1 ( <i>unc-54</i> 3'UTR) (pCZGY1340)<br>(1 ng/μl)   | <i>efn-1(0); kyls104</i> | CZ13373         |
| <i>juEx3272</i>  | <i>Pdyf-7</i> -EFN-1 ( <i>efn-1</i> 3'UTR) (pCZGY1341)<br>(1 ng/μl)    | <i>efn-1(0); kyls104</i> | CZ13965         |

|                 |                                                                  |                                  |         |
|-----------------|------------------------------------------------------------------|----------------------------------|---------|
| <i>juEx4909</i> | Pstr-1-EFN-1 ( <i>efn-1</i> 3'UTR) (pCZGY2224) (1 ng/μl)         | <i>efn-1(0); kyls104</i>         | CZ16743 |
| <i>juEx4344</i> | <i>Pdyf-7</i> -ABL-1 ( <i>abl-1</i> 3'UTR) (pCZGY1845) (1 ng/μl) | <i>vab-1(kd); abl-1; kyls104</i> | CZ15789 |
| <i>juEx4345</i> | <i>Pdyf-7</i> -ABL-1 ( <i>abl-1</i> 3'UTR) (pCZGY1845) (1 ng/μl) | <i>vab-1(kd); abl-1; kyls104</i> | CZ15791 |
| <i>juEx4345</i> | <i>Pdyf-7</i> -ABL-1 ( <i>abl-1</i> 3'UTR) (pCZGY1845) (1 ng/μl) | <i>vab-1(0); kyls104</i>         | CZ18522 |
| <i>juEx5055</i> | Pstr-1-ABL-1 ( <i>abl-1</i> 3'UTR) (pCZGY2227) (25 ng/μl)        | <i>vab-1(kd); abl-1; kyls104</i> | CZ17047 |
| <i>juEx5057</i> | Pstr-1-ABL-1 ( <i>abl-1</i> 3'UTR) (pCZGY2227) (25 ng/μl)        | <i>vab-1(kd); abl-1; kyls104</i> | CZ17049 |
| <i>juEx5059</i> | Pstr-1-ABL-1 ( <i>abl-1</i> 3'UTR) (pCZGY2227) (25 ng/μl)        | <i>vab-1(kd); abl-1; kyls104</i> | CZ17051 |
| <i>juEx5059</i> | Pstr-1-ABL-1 ( <i>abl-1</i> 3'UTR) (pCZGY2227) (25 ng/μl)        | <i>vab-1(kd); kyls104</i>        | CZ18664 |

\* GEORGE ET AL., 1998.

\*\* CHIN-SANG ET AL., 1999.
